# Supplementary material for: Protection effect of nicotinamide on cardiomyoblast hypoxia/re-oxygenation injury: study of cellular mitochondrial metabolism
Source: Royal Society of Chemistry journal article supplement (doi:10.1039/c6mb00108d), 2016-04-18
Supplement: c6mb00108d1.pdf [file c6mb00108d1.pdf]

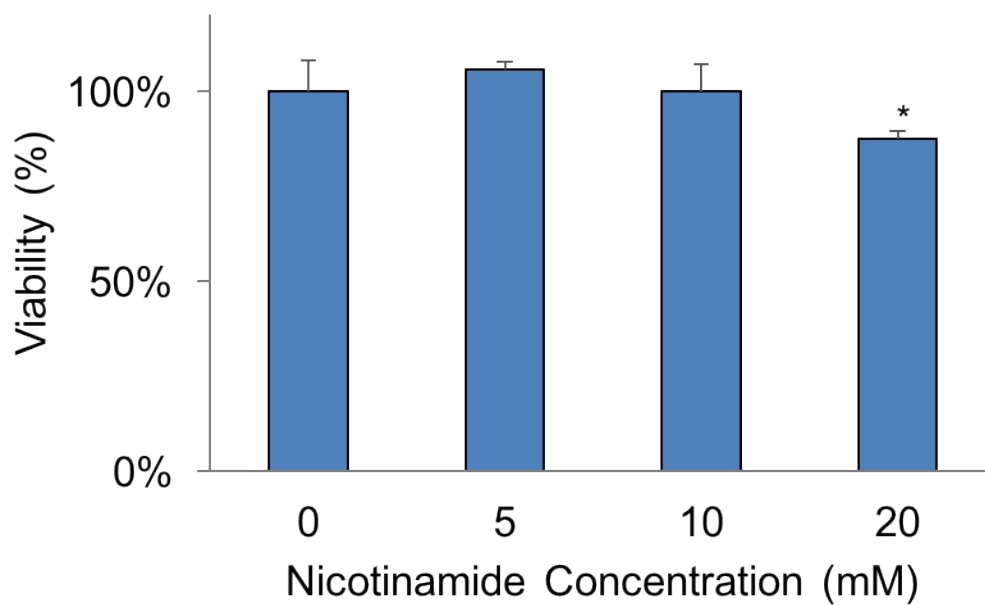

Fig. S1 Percent viability values of high level nicotinamide concentration in normal condition. n=6

Table S1. Specific compound dependent MS parameters used in multiple reaction monitoring (MRM)

| Measured Compound | Precursor ion | Fragment ion | Dwell (ms) | Fragmentor (V) | CE (V) |
|-------------------|---------------|--------------|------------|----------------|--------|
| AcCoA             | 808.1         | 408          | 12         | 200            | 40     |
| NADPH             | 744           | 408          | 10         | 240            | 40     |
| NADP              | 742           | 620          | 10         | 100            | 10     |
| NADH              | 664           | 346          | 10         | 200            | 20     |
| NAD               | 662           | 540          | 10         | 80             | 20     |
| ATP               | 506           | 408          | 12         | 135            | 20     |
| ADP               | 426           | 159          | 12         | 100            | 20     |
| AMP               | 346.1         | 97           | 12         | 100            | 20     |
| IsoCIT            | 191           | 111          | 73         | 20             | 60     |
| GLU               | 146.2         | 128          | 12         | 80             | 5      |
| AKG               | 145           | 101          | 20         | 70             | 2      |
| MAL               | 133           | 115          | 20         | 80             | 5      |
| SUC               | 117.1         | 99           | 20         | 60             | 5      |
| FUM               | 115.1         | 71           | 20         | 60             | 5      |
| LA                | 89.1          | 70.9         | 20         | 60             | 5      |
| PYR               | 87.1          | 43           | 20         | 60             | 2      |

Table S2. Linearity of calibration, limits of detection and relative standard deviation of three concentration levels of standards determined by the established HPLC/MS/MS method

| Measured Compound | Linearity     |                | LOD (ng/mL) | Low                          |      | Medium                       |      | High                         |      |
|-------------------|---------------|----------------|-------------|------------------------------|------|------------------------------|------|------------------------------|------|
|                   | Range (ng/mL) | R <sup>2</sup> |             | Spiked concentration (ug/mL) | RSD% | Spiked concentration (ug/mL) | RSD% | Spiked concentration (ug/mL) | RSD% |
| AcCoA             | 5-5000        | 0.9995         | 1           | 0.588                        | 7%   | 1.18                         | 5%   | 2.35                         | 6%   |
| NADPH             | 10-10000      | 0.9992         | 1           | 1.25                         | 7%   | 2.51                         | 8%   | 5.01                         | 4%   |
| NADP              | 15-10000      | 0.9997         | 5           | 0.586                        | 6%   | 1.17                         | 5%   | 2.35                         | 4%   |
| NADH              | 10-10000      | 0.9990         | 2           | 0.611                        | 7%   | 1.22                         | 7%   | 2.45                         | 10%  |
| NAD               | 50-10000      | 0.9982         | 5           | 1.26                         | 4%   | 2.51                         | 11%  | 5.03                         | 5%   |
| ATP               | 80-10000      | 0.9992         | 25          | 1.58                         | 5%   | 3.17                         | 9%   | 6.33                         | 5%   |
| ADP               | 80-10000      | 0.9987         | 25          | 1.58                         | 3%   | 3.15                         | 5%   | 6.30                         | 7%   |
| AMP               | 25-3000       | 0.9993         | 5           | 0.629                        | 9%   | 1.26                         | 5%   | 2.52                         | 4%   |
| IsoCIT            | 150-20000     | 0.9995         | 1           | 1.28                         | 2%   | 2.56                         | 4%   | 5.11                         | 2%   |
| GLU               | 250-25000     | 0.9992         | 5           | 1.51                         | 3%   | 3.03                         | 5%   | 6.05                         | 3%   |
| AKG               | 50-20000      | 0.9990         | 1           | 2.28                         | 8%   | 4.57                         | 3%   | 9.14                         | 2%   |

|     |           |        |    |       |    |       |    |       |    |
|-----|-----------|--------|----|-------|----|-------|----|-------|----|
| MAL | 50-20000  | 0.9992 | 1  | 1.35  | 3% | 2.70  | 1% | 5.40  | 2% |
| SUC | 50-10000  | 0.9994 | 1  | 1.33  | 8% | 2.67  | 3% | 5.34  | 3% |
| FUM | 50-8000   | 0.9982 | 10 | 0.736 | 4% | 1.47  | 2% | 2.95  | 3% |
| LA  | 100-10000 | 0.9989 | 1  | 0.626 | 6% | 1.25  | 4% | 2.50  | 4% |
| PYR | 50-10000  | 0.9993 | 10 | 0.063 | 5% | 0.125 | 6% | 0.250 | 2% |

---
